# Supplementary material for: A novel poly[(N-vinylimidazole)-co-(1-pyrenylmethyl methacrylate)] ferric complex with fluorescence and superparamagnetism
Source: Royal Society of Chemistry journal article supplement (doi:10.1039/c2ra22395c), 2012-01-01
Supplement: c2ra22395c.pdf [file c2ra22395c.pdf]

## ***Electronic Supplementary Information***

### **A novel poly[(*N*-vinylimidazole)-*co*-(1-pyrenylmethyl methacrylate)] ferric complex with fluorescence and superparamagnetism**

Jian Cui, Shaobei Yang, Jinfang Zhang, Shuai Zhao and Yehai Yan\*

Key Laboratory of Rubber-plastics, Ministry of Education/Shandong Provincial Key  
Laboratory of Rubber-plastics, College of Polymer Science and Engineering, Qingdao  
University of Science and Technology, Qingdao 266042, China

E-mail: yhyan@qust.edu.cn; Fax: +86-532-84023977; Tel: +86-532-84022416

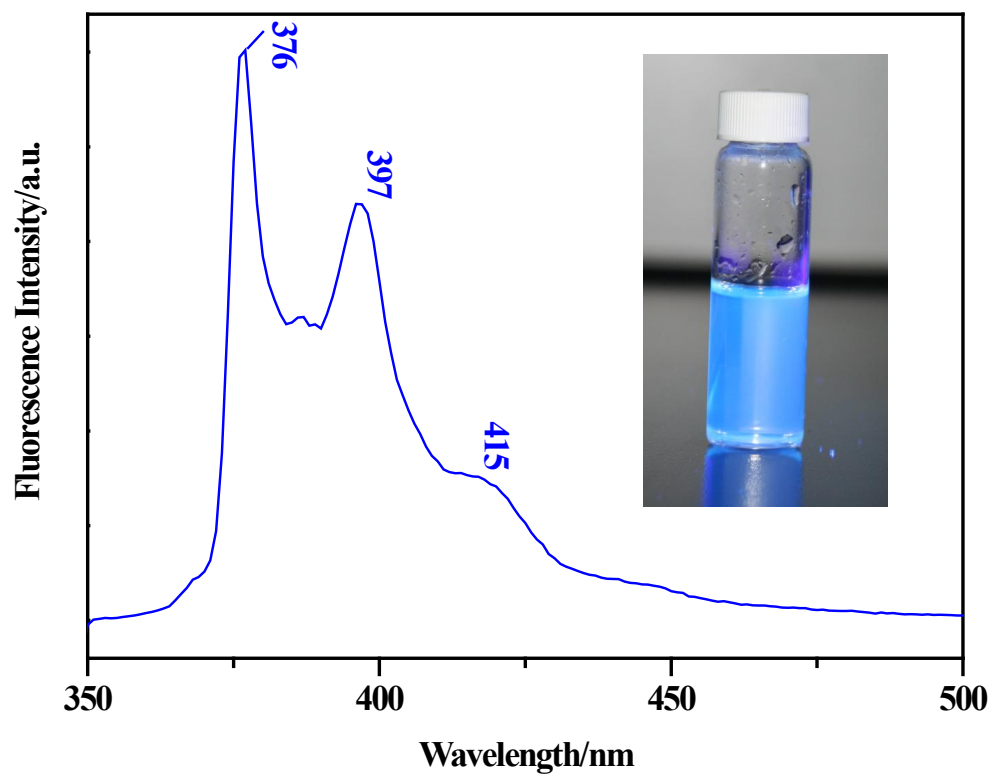

**Figure S1** Fluorescence spectrum of VI-co-PyMMA (5 μg.ml<sup>-1</sup> in ethanol) with an excitation wavelength of 347 nm. Inset is a digital photo of the same VI-co-PyMMA solution irradiated by 365 nm UV-light.

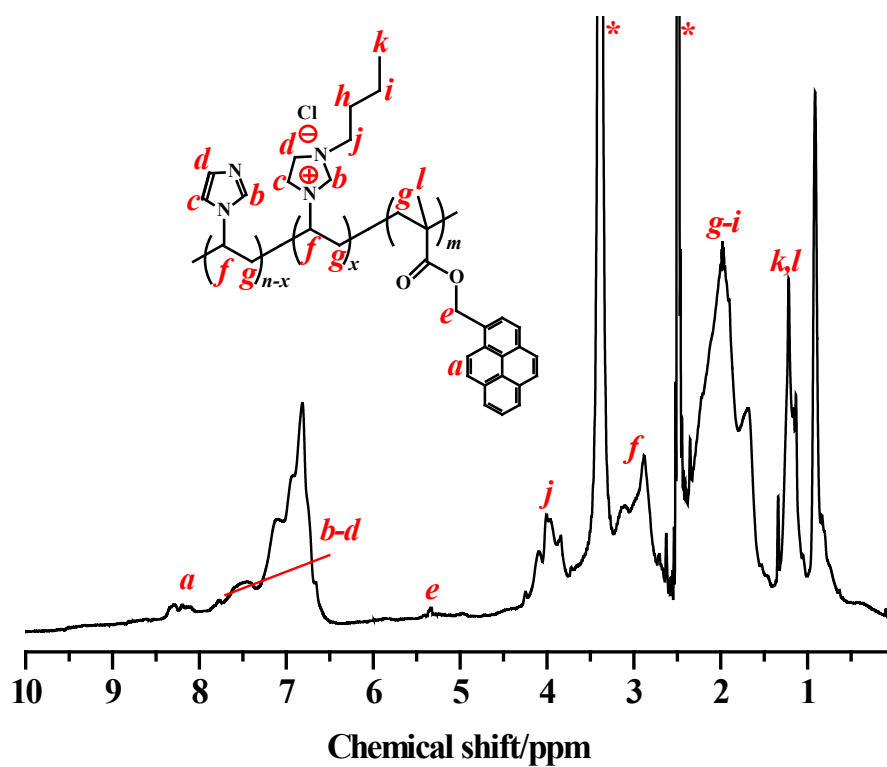

**Figure S2** <sup>1</sup>H-NMR spectrum of **S**<sub>0</sub> dissolved in DMSO-d<sub>6</sub>.

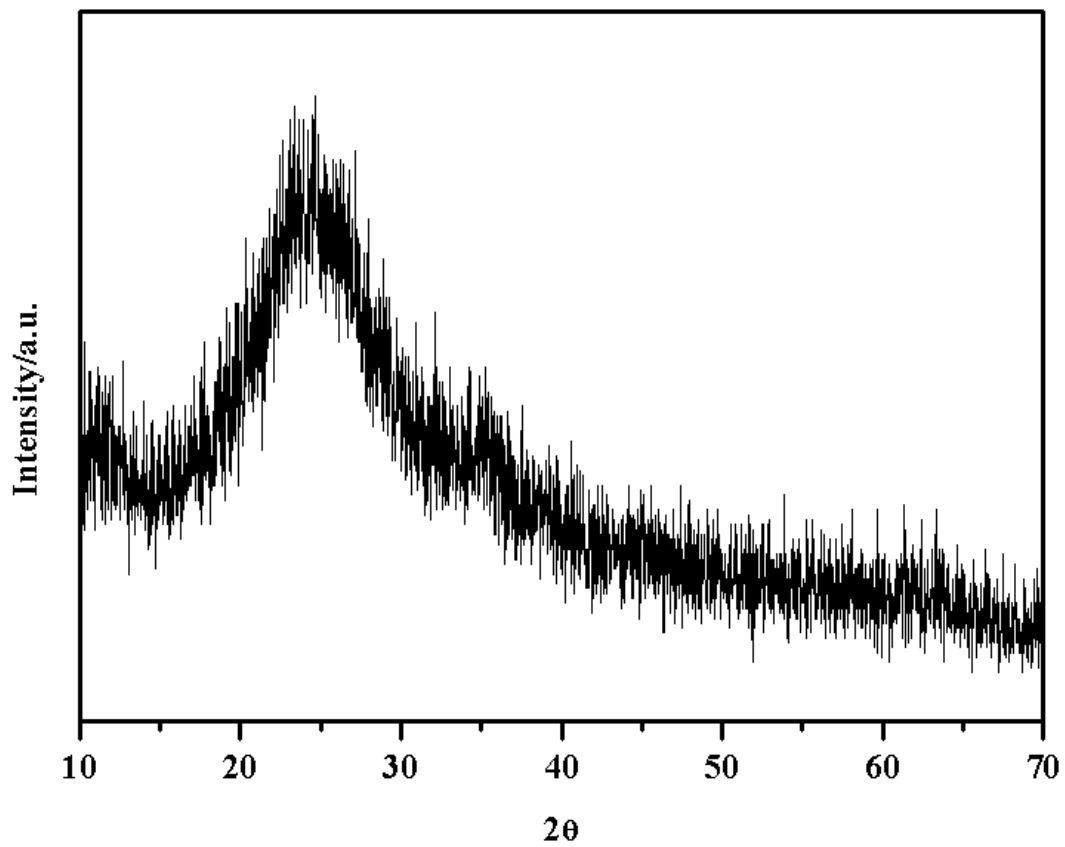

**Figure S3** XRD pattern of S<sub>4</sub> powders.

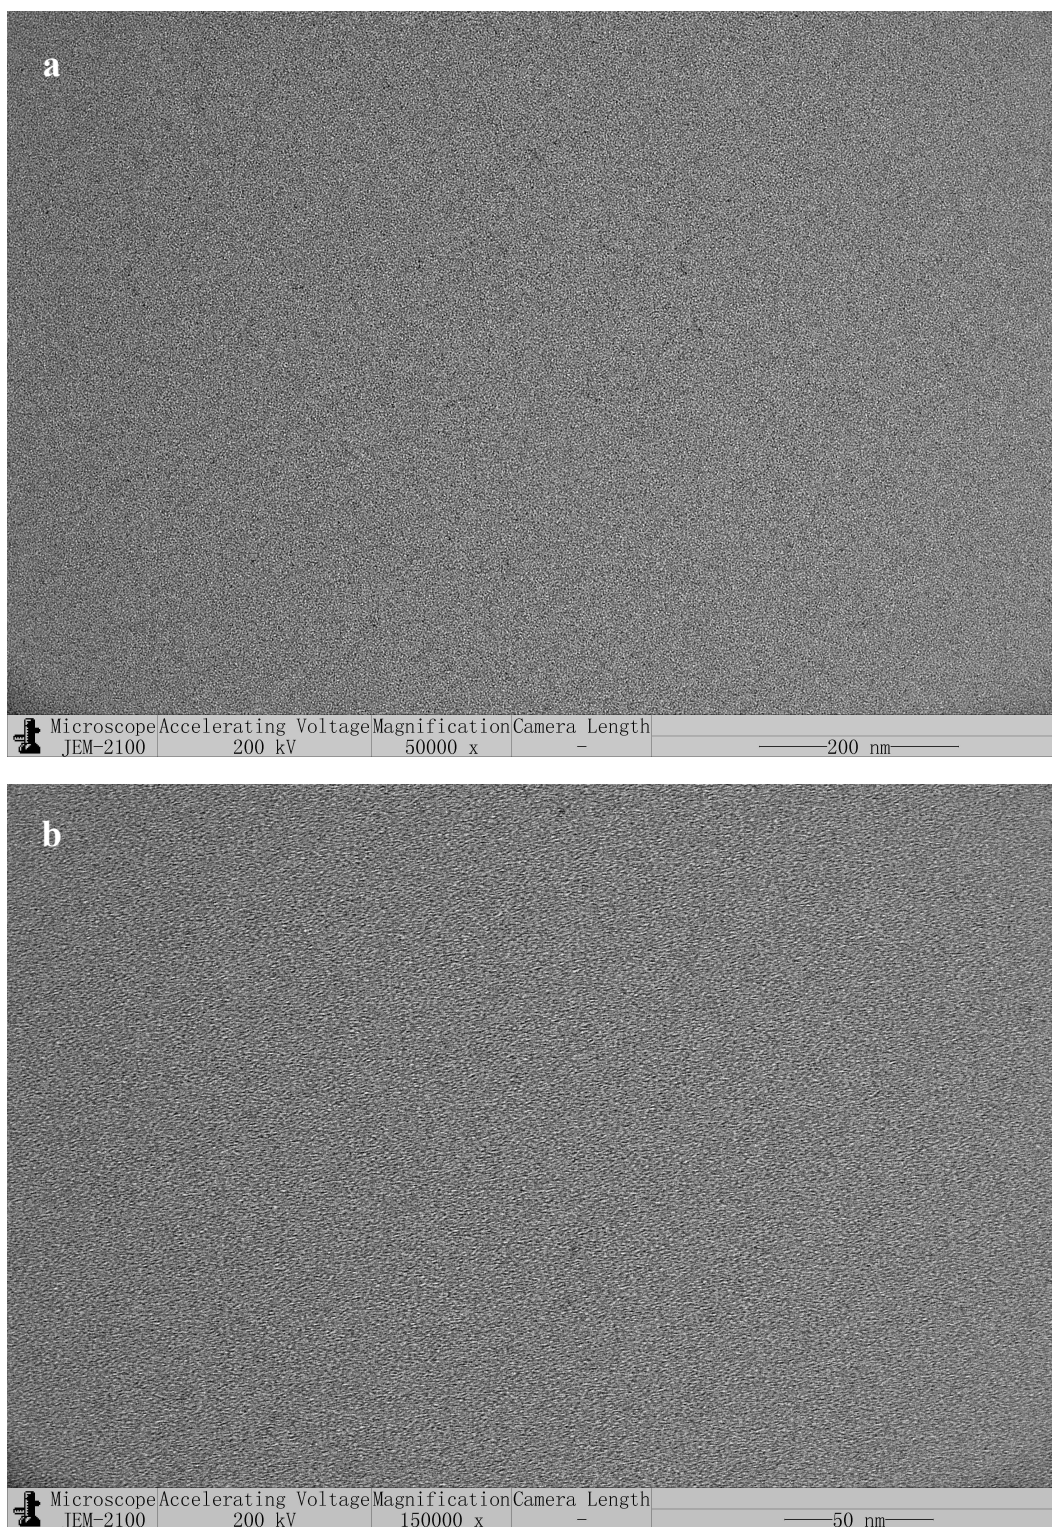

**Figure S4** TEM images of S<sub>4</sub> thin film coated on a carbon-covered copper grid: a) ×50k magnification, b) ×150k magnification.

The fluorescence quantum yields ( $\phi$ ) of  $S_0$  and  $S_N$  ( $N=1\sim6$ ) were measured by using the method described in the reference: Q. He, J. Shi, X. Cui, J. Zhao, Y. Chen and J. Zhou, *J. Mater. Chem.*, 2009, **19**, 3395-3403. The quinine solution in 0.1 M of  $H_2SO_4$  ( $\phi = 0.55$ ) was taken as the reference. Table S1 summarizes the values of  $\phi$  of  $S_0$  and  $S_N$  ( $N=1\sim6$ ).

**Table S1** Quantum yields of  $S_0$  and  $S_N$  ( $N=1\sim6$ ).

| Sample No. | $S_0$ | $S_1$ | $S_2$ | $S_3$ | $S_4$ | $S_5$ | $S_6$ |
|------------|-------|-------|-------|-------|-------|-------|-------|
| $\phi$     | 0.488 | 0.392 | 0.235 | 0.186 | 0.133 | 0.073 | 0.029 |
